# Supplementary material for: Facile in situ synthesis of double perovskite Cs2AgBiBr6/WS2 heterostructure and interfacial charge transfer mediated high-performance ultraviolet photodetection
Source: Royal Society of Chemistry journal article supplement (doi:10.1039/d4tc02069c), 2024-01-01
Supplement: d4tc02069c1.pdf [file d4tc02069c1.pdf]

## Supplementary Information

### Facile In-situ Synthesis of Double Perovskite $\text{Cs}_2\text{AgBiBr}_6/\text{WS}_2$ Heterostructure and Interfacial Charge Transfer Mediated High- Performance Ultraviolet Photodetection

Ravinder Chahal<sup>1</sup>, Abdul Kaim Mia<sup>2</sup>, Abhilasha Bora<sup>2</sup>, and P. K. Giri<sup>1\*</sup>

<sup>1</sup>Department of Physics, Indian Institute of Technology Guwahati, Guwahati, Assam 781039

<sup>2</sup>Centre for Nanotechnology, Indian Institute of Technology Guwahati, Guwahati, Assam  
781039



**Figure S1.** (a) FETEM image of multi-layer  $\text{WS}_2$  nanosheets prepared by ultrasonication method. (b) The corresponding selected area electron diffraction pattern of  $\text{WS}_2$  nanosheets.



**Figure S2.** (a) FETEM image of the  $\text{Cs}_2\text{AgBiBr}_6/\text{WS}_2$  heterostructure. (b-g) Elemental mapping of Cs, Ag, Bi, Br, W, and S elements in  $\text{Cs}_2\text{AgBiBr}_6/\text{WS}_2$  heterostructure, respectively. The scale bar in each image is 100 nm.



**Figure S3:** The corresponding TEM-EDX spectra of DP/ $\text{WS}_2$  heterostructure.



**Figure S4.** Comparison of the Raman spectra of  $\text{WS}_2$  (red) and  $\text{Cs}_2\text{AgBiBr}_6/\text{WS}_2$  (blue) heterostructure.



**Figure S5.** (a) XPS survey scan spectra of  $\text{Cs}_2\text{AgBiBr}_6$  DP (black) and  $\text{Cs}_2\text{AgBiBr}_6/\text{WS}_2$  heterostructure (red). (b) Comparison of high-resolution XPS spectra of tungsten (W) in  $\text{WS}_2$  nanosheets and  $\text{Cs}_2\text{AgBiBr}_6/\text{WS}_2$  heterostructure.



**Figure S6.** (a) Tauc plot of  $\text{Cs}_2\text{AgBiBr}_6$  DP (black) and  $\text{Cs}_2\text{AgBiBr}_6/\text{WS}_2$  heterostructure (red). The green dotted line displays the linear fitting of the graphs. (b) Tauc plot of the few-layer  $\text{WS}_2$  nanosheets (black). The red line is the linear fitting of the graph.



**Figure S7.** Time-resolved PL spectra of  $\text{Cs}_2\text{AgBiBr}_6$  DP (magenta) and  $\text{Cs}_2\text{AgBiBr}_6/\text{WS}_2$  heterostructure (orange). The solid blue line represents exponential fitting.

**Table S1:** TRPL decay parameters of Cs<sub>2</sub>AgBiBr<sub>6</sub> DP and Cs<sub>2</sub>AgBiBr<sub>6</sub>/WS<sub>2</sub> HS.

| Sample                                                       | A <sub>1</sub> | τ <sub>1</sub> (ns) | A <sub>2</sub> | τ <sub>2</sub> (ns) | τ <sub>avg</sub> (ns) |
|--------------------------------------------------------------|----------------|---------------------|----------------|---------------------|-----------------------|
| Cs <sub>2</sub> AgBiBr <sub>6</sub> DP                       | 2.4            | 0.16                | 7.3            | 3.7                 | 3.65                  |
| Cs <sub>2</sub> AgBiBr <sub>6</sub> DP/ WS <sub>2</sub> (HS) | 3.5            | 0.14                | 2.8            | 0.95                | 0.82                  |



**Figure S8.** UPS spectra of (a) Cs<sub>2</sub>AgBiBr<sub>6</sub> DP, and (b) WS<sub>2</sub> nanosheets. The inset in each case shows the magnified view of the plot in the lower binding energy region.



**Figure S9.** The real-time image of the Cs<sub>2</sub>AgBiBr<sub>6</sub>/WS<sub>2</sub> heterostructure photodetector.



**Figure S10.** I-V characteristics of Cs<sub>2</sub>AgBiBr<sub>6</sub> DP with varying incident laser power.



**Figure S11.** Dark and photo I-V characteristics of WS<sub>2</sub> nanosheets with different intensity laser illumination.



**Figure S12.** Wavelength-dependent Responsivity and absorption spectra of DP/WS<sub>2</sub> heterostructure.



**Figure S13.** (a) Photocurrent response of  $\text{Cs}_2\text{AgBiBr}_6$  DP with different laser power (mW). (b) Photocurrent response of  $\text{Cs}_2\text{AgBiBr}_6/\text{WS}_2$  heterostructure with varying incident laser powers for 405 nm diode laser.



**Figure S14.** Photocurrent rise and fall time profiles of  $\text{Cs}_2\text{AgBiBr}_6$  DP with pulsed laser excitation.
